# Supplementary material for: Postsynaptic Density-95 Isoform Abnormalities in Schizophrenia
Source: Oxford University Press journal article supplement (doi:10.1093/schbul/sbw173), 2016-11-23
Supplement: sbw173_suppl_Supplemental_Figure_Legends.doc [file sbw173_suppl_Supplemental_Figure_Legends.doc]

Supplemental Methods:

Rat PMI study:

Rodent experiments were carried out according to University of Cincinnati guidelines and all procedures complied with IACUC regulations. Male Sprague-Dawley rats (250g), 3 per group, were sacrificed and the heads were placed at 4°C for 24 or 48 hours. At the 24 and 48 hour time points the brains were extracted and the frontal cortex was dissected and prepared for western blot analyses compared with 0 hour PMI (Figure S2).

Supplemental Figure Legends:

Supplemental Figure 1. Correlation analyses between postmortem interval and transcript isoform or protein expression. TaqMan assays to measure PSD-95 isoforms (A: alpha + truncated, B: beta, or C: truncated only) showed no correlation with PMI. Consistent with the transcript data, no correlation was found between PSD-95 protein expression and PMI (D).

Supplemental Figure 2. Rodent postmortem interval analysis. PSD-95 protein expression was measured by western blot using rat brain cortex 0, 24, or 48 hours postmortem. We detected no change in PSD-95 protein expression after 24 or 48 hours, F(2, 6) = 0.57, p > 0.05 (data normalized to β-tubulin, A). PSD-95 protein expression was not significant in un-normalized data, F(2, 6) = 0.49, p > 0.05 (B).
